# Supplementary material for: Neutrophil derived LTB4 induces macrophage aggregation in response to encapsulated Streptococcus iniae infection
Source: PubMed Central journal article supplement (PMC5489177; doi:10.1371/journal.pone.0179574), 2017-06-28

**A**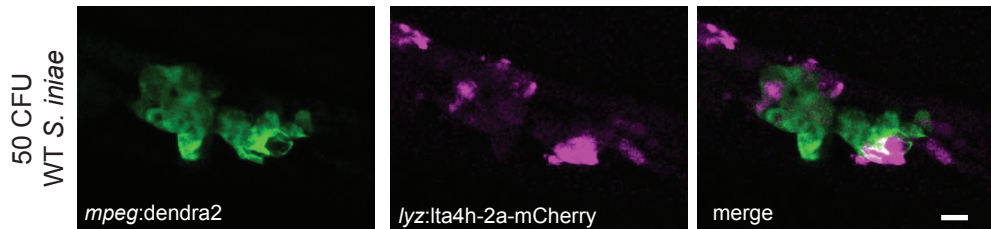**B**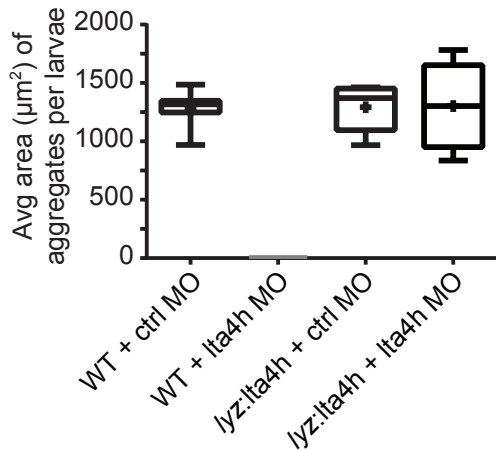**C**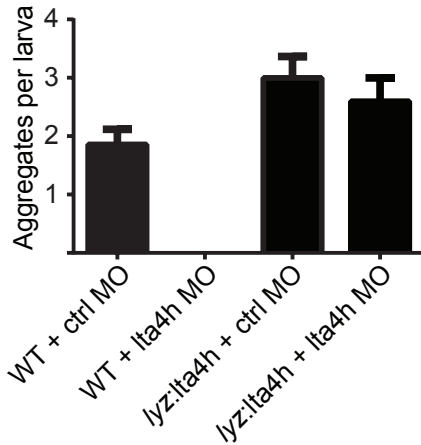

Supplement: pone.0179574.s001.pdf [file pone.0179574.s001.pdf]
